# Supplementary material for: Nanotopography Evaluation of NiTi Alloy Exposed to Artificial Saliva and Different Mouthwashes
Source: MDPI journal article supplement (doi:10.3390/ma15238705), 2022-12-06
Supplement: s1 [file s1]

*Supplementary Materials*

# Nanotopography Evaluation of NiTi Alloy Exposed to Artificial Saliva and Different Mouthwashes

Zoran Bobić \*, Sanja Kojić, Goran M. Stojanović, Vladimir Terek, Lazar Kovačević and Pal Terek

Faculty of Technical Sciences, University of Novi Sad, Trg Dositeja Obradovića 6, Novi Sad, 21000, Serbia

\* Correspondence: zoranbobic@uns.ac.rs; Tel.: +381-21-485-2330

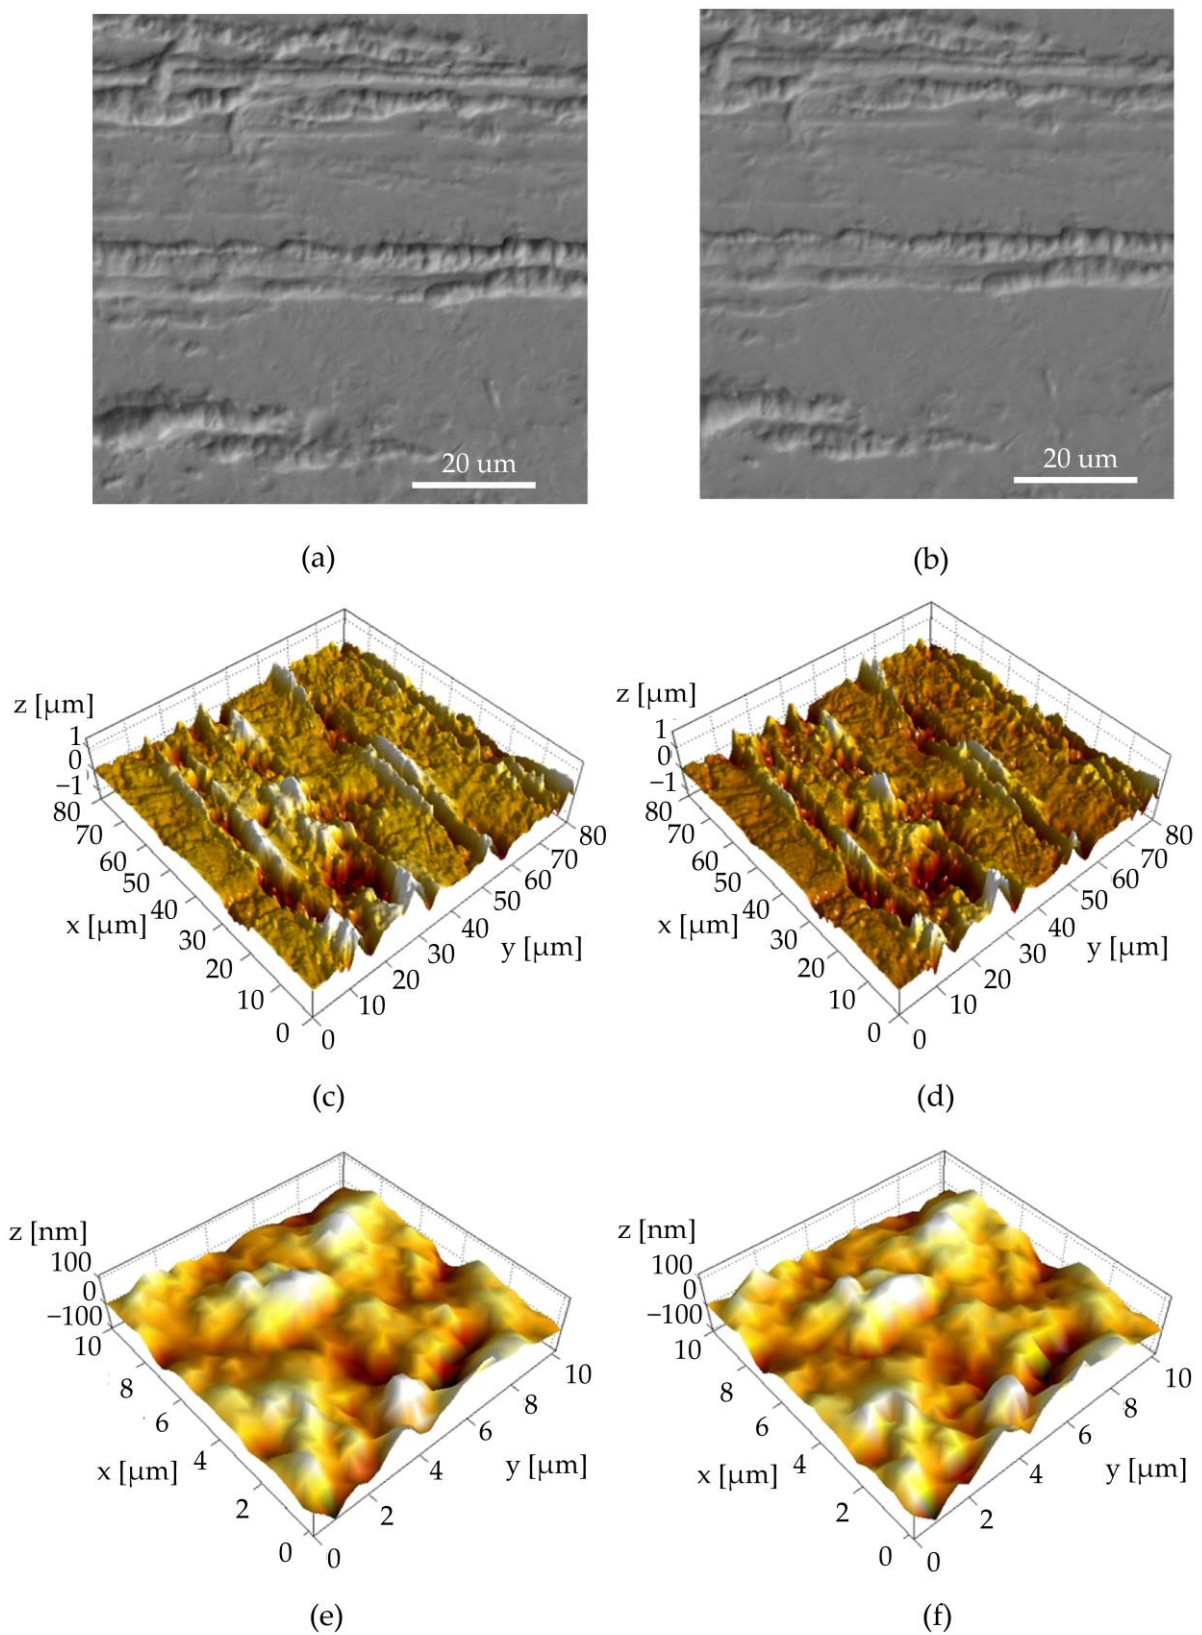

**Figure S1.** Representative images before (left) and after the corrosion test (right). Artificial saliva (Sample 1): (a,b) SEM images of 80 × 80 μm area; (c,d) AFM topography images of the same 80 × 80 μm area; (e,f) AFM topography images of cropped 10 × 10 μm smooth area between the grooves.

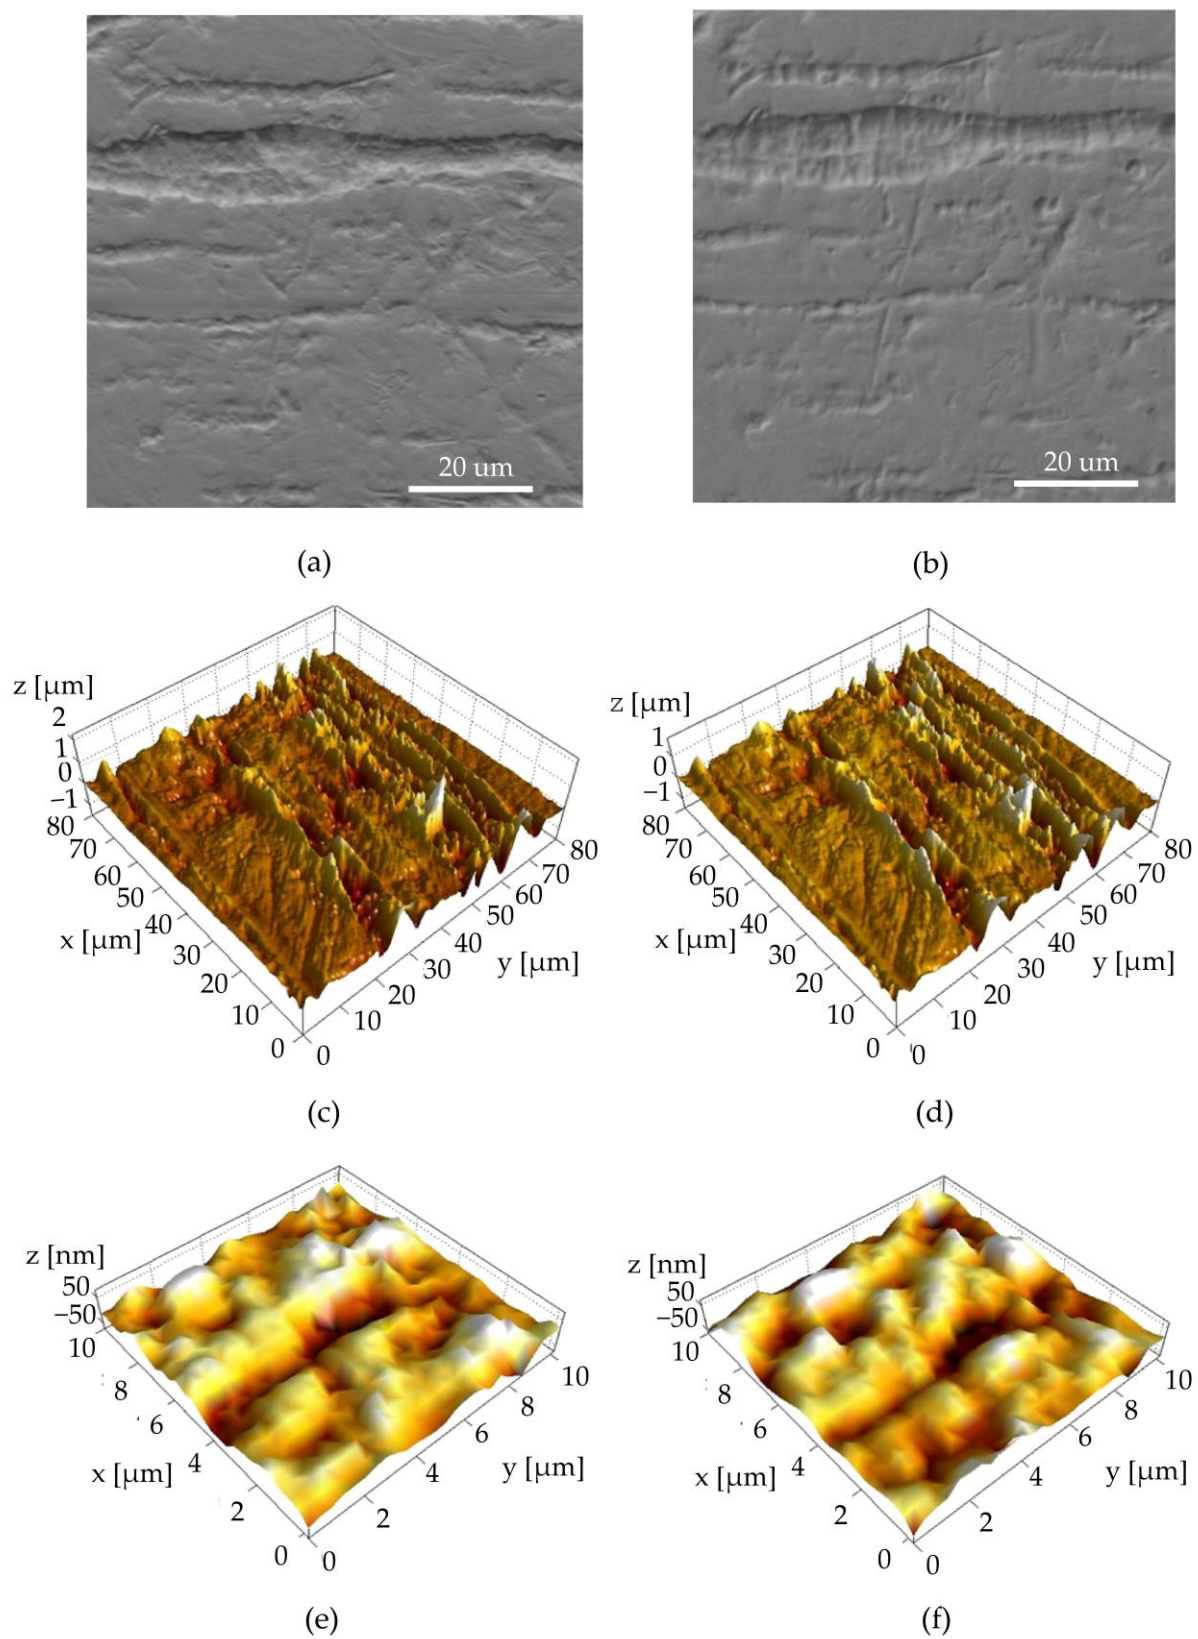

**Figure S2.** Representative images before (left) and after the corrosion test (right). Aquafresh Big teeth® (Sample 2): (a,b) SEM images of 80 × 80 μm area; (c,d) AFM topography images of the same 80 × 80 μm area; (e,f) AFM topography images of cropped 10 × 10 μm smooth area between the grooves.



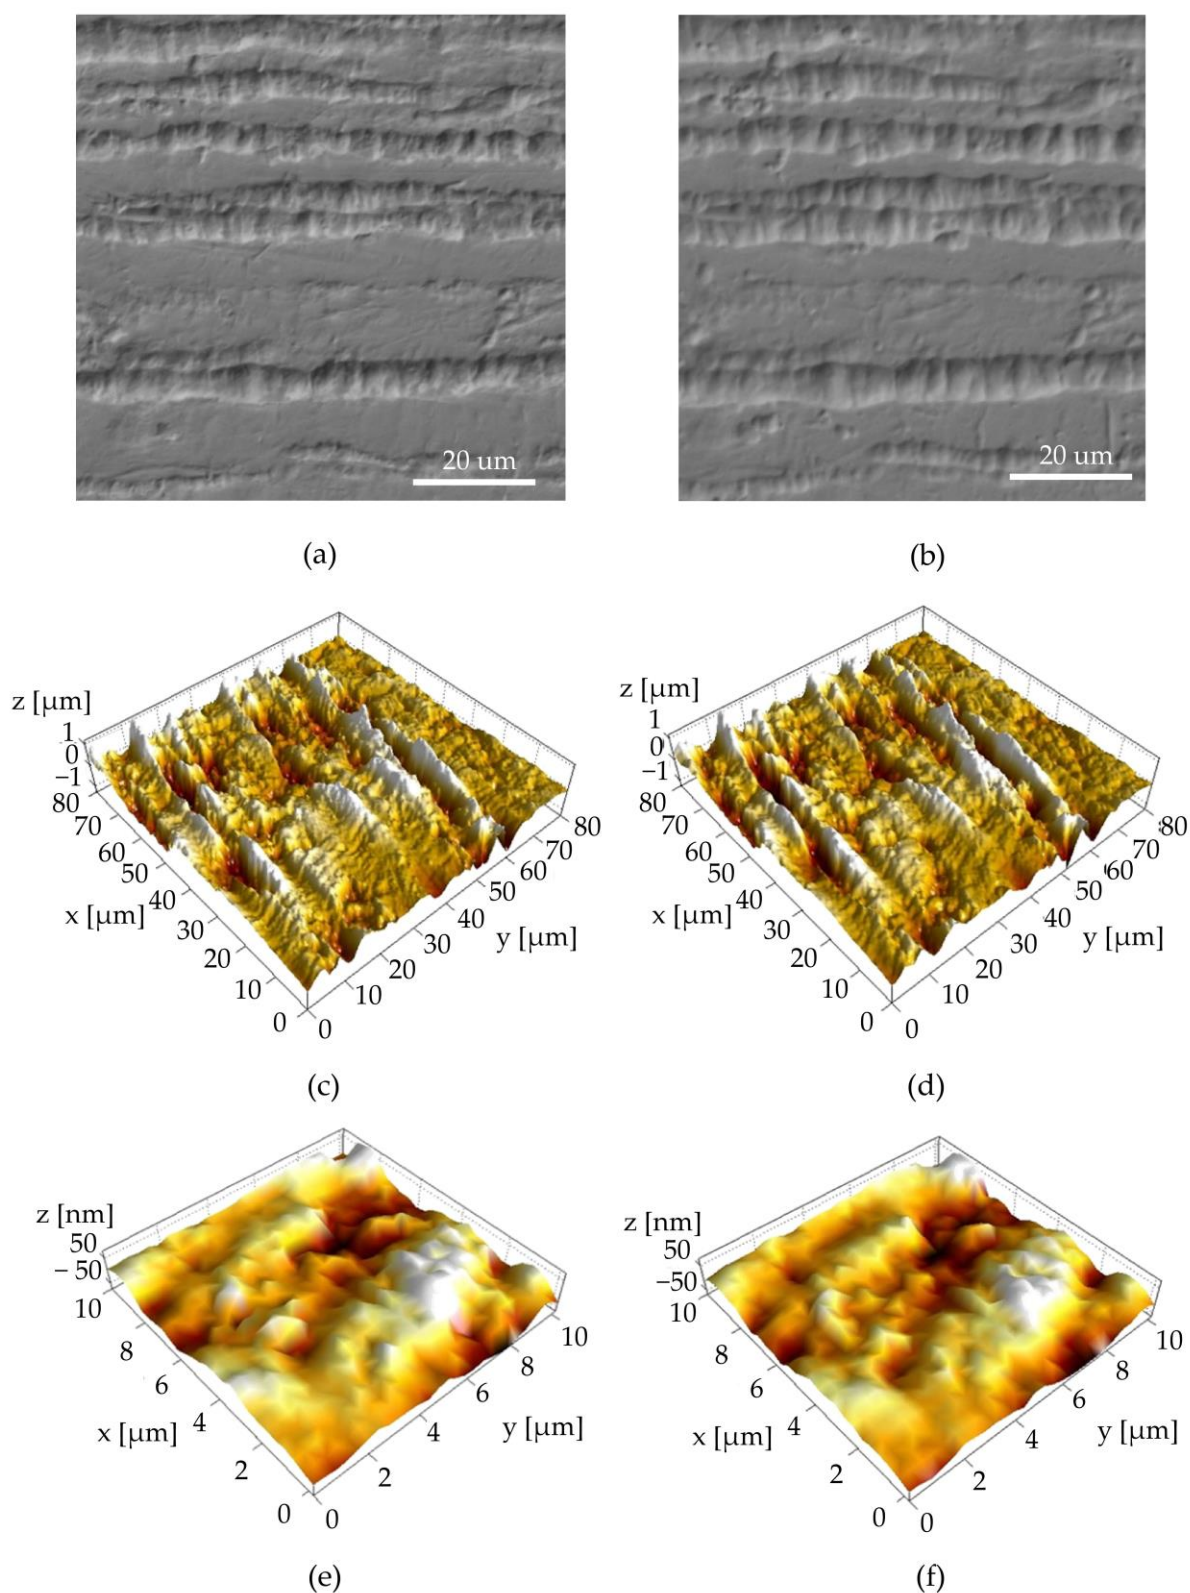

**Figure S3.** Representative images before (left) and after the corrosion test (right). Listerine® (Sample 4): (a,b) SEM images of  $80 \times 80 \mu\text{m}$  area; (c,d) AFM topography images of the same  $80 \times 80 \mu\text{m}$  area; (e,f) AFM topography images of cropped  $10 \times 10 \mu\text{m}$  smooth area between the grooves.
